# Supplementary material for: Regulations on the Use of Antibiotics in Livestock Production in South America: A Comparative Literature Analysis
Source: MDPI journal article supplement (doi:10.3390/antibiotics12081303), 2023-08-09
Supplement: s1 [file s1]

Table S1: Legislation, Guidelines, and other documents on Veterinary Antibiotic Use in South American Countries

| Argentina |                                                                                                                                                                                                                                                                                                                                                                   |
|-----------|-------------------------------------------------------------------------------------------------------------------------------------------------------------------------------------------------------------------------------------------------------------------------------------------------------------------------------------------------------------------|
| Year      | Legislation/Other Documents                                                                                                                                                                                                                                                                                                                                       |
| 2009      | Resolución n° 63                                                                                                                                                                                                                                                                                                                                                  |
| 2010      | Resolución 542- Establécense requisitos sobre instalaciones, bioseguridad, higiene y manejo sanitario, para el registro y habilitación sanitaria de establecimientos avícolas de producción                                                                                                                                                                       |
| 2011      | Resolución n°666- Créase el Libro de Registros de Tratamientos, en el ámbito de los establecimientos pecuarios de producción de animales para consumo humano en todo el Territorio Nacional, con el objeto de registrar todos y cada uno de los tratamientos vinculados a la administración de productos veterinarios sobre los animales existentes en los mismos |
|           | Resolución n°323- Procedimiento de notificación de eventos. Establécese el Procedimiento para la notificación de eventos relacionados con la utilización de Productos Veterinarios aprobados.                                                                                                                                                                     |
| 2015      | Resolución n° 594- Se aprueba la norma técnica de alimentos para animales de lá República Argentina                                                                                                                                                                                                                                                               |
|           | Resolución n° 591- Crea el Programa Nacional de Vigilancia de la Resistencia a Los antimicrobianos en animales destinados al consumo humano                                                                                                                                                                                                                       |
| 2018      | Resolución 575- Establece requisitos para el bienestar animal de los pollos de engorde                                                                                                                                                                                                                                                                            |
|           | Resolución n° 1119- Adecua la citada Resolución N° 594/15 con relación a las sustancias evaluadas                                                                                                                                                                                                                                                                 |
| 2019      | Resolución n° 1642- MARCO REGULATORIO PRODUCTOS VETERINARIOS                                                                                                                                                                                                                                                                                                      |
|           | Resolución n°1642-Anexo III Formulario de Inscripción para produtos farmacológicos de uso veterinário                                                                                                                                                                                                                                                             |
|           | Resolución n° 22- Productos veterinarios: prohibición de elaboración, distribución, importación, uso y tenencia                                                                                                                                                                                                                                                   |
|           | Ley 14.072- Del Ejercicio de la Medicina Veterinaria                                                                                                                                                                                                                                                                                                              |
|           | Resolución 1697- Exigencias mínimas relativas al bienestar animal                                                                                                                                                                                                                                                                                                 |
|           | - Manual de Bienestar Animal: En Plantas de Aves y Lagomorfos                                                                                                                                                                                                                                                                                                     |
| -         | Manual de bienestar animal: un enfoque práctico para el buen manejo de especies domésticas durante su tenencia, producción, concentración, transporte y faena                                                                                                                                                                                                     |
| -         | Controle de Resíduos (PLAN CREHA)                                                                                                                                                                                                                                                                                                                                 |
| Brazil    |                                                                                                                                                                                                                                                                                                                                                                   |
| Year      | Legislation/Other Documents                                                                                                                                                                                                                                                                                                                                       |
| 1996      | Portaria 74- Roteiro para registro de produtos biológicos de uso veterinário                                                                                                                                                                                                                                                                                      |
| 2003      | Instrução Normativa n° 9- Proibir a fabricação, a manipulação, o fracionamento, a comercialização, a importação e o uso de princípios ativos de cloranfenicol.                                                                                                                                                                                                    |
| 2004      | Decreto n°5053- Regulamento de Fiscalização de Produtos de Uso Veterinário e dos Estabelecimentos que os fabriquem ou Comercializem, e dá outras providências                                                                                                                                                                                                     |
| 2005      | Instrução Normativa n° 65- Regulamento técnico sobre fabricação e o emprego de alimentos para animais contendo medicamentos                                                                                                                                                                                                                                       |
| 2009      | Instrução Normativa n°22- Regulamenta a embalagem, rotulagem e propaganda dos produtos destinados à alimentação animal                                                                                                                                                                                                                                            |
|           | Instrução Normativa n°26- Proibir a fabricação, a manipulação, o fracionamento, a comercialização, a importação e o uso de princípios ativos de cloranfenicol.                                                                                                                                                                                                    |
| 2012      | Instrução Normativa n° 14- Proibi a utilização de espiramicina e eritromicina como melhoradores de desempenho em animais.                                                                                                                                                                                                                                         |
| 2015      | Decreto n°8448- Altera o regulamento de fiscalização de produtos de uso veterinário e dos estabelecimentos que os fabriquem ou comercializem.                                                                                                                                                                                                                     |
| 2016      | Instrução Normativa n° 45- Proibi a utilização de sulfato de colistina como melhoradores de desempenho em animais                                                                                                                                                                                                                                                 |
|           | Resolução 1138- Conselho Federal de Medicina Veterinária                                                                                                                                                                                                                                                                                                          |
| 2018      | Instrução Normativa n°54- Aprova o regulamento técnico para o registro de aditivos antimicrobianos melhores de desempenho e aditivos anticoccidianos administrados via alimentação animal                                                                                                                                                                         |
| 2020      | Instrução Normativa n°1- Proibi a utilização de tilosina, lincomicina e tiamulina como melhoradores de desempenho em animais.                                                                                                                                                                                                                                     |
|           | Instrução Normativa 113- Estabelecer as boas práticas de manejo e bem-estar animal nas granjas de suínos de criação comercial                                                                                                                                                                                                                                     |
| -         | Suinocultura: Uma Saúde e um Bem-estar                                                                                                                                                                                                                                                                                                                            |
| -         | O uso prudente e eficaz de antibióticos na suinocultura                                                                                                                                                                                                                                                                                                           |
| -         | Painel de Negócios Inteligente do Ministério da Agricultura e Pecuária e Abastecimento                                                                                                                                                                                                                                                                            |
| -         | Agromonitoria                                                                                                                                                                                                                                                                                                                                                     |
| -         | Programa de Vigilância e Monitoramento da Resistência aos antimicrobianos no âmbito da agropecuária                                                                                                                                                                                                                                                               |
| -         | Plano Nacional de Controle de Resíduos e contaminantes PNCRC/ANIMAL                                                                                                                                                                                                                                                                                               |
| Chile     |                                                                                                                                                                                                                                                                                                                                                                   |
| Year      | Legislation/Other Documents                                                                                                                                                                                                                                                                                                                                       |
| 2005      | Decreto n°25- Reglamento de productos farmacéuticos de uso exclusivamente veterinario                                                                                                                                                                                                                                                                             |

|                 |                                                                                                                                                                                                                                                                        |
|-----------------|------------------------------------------------------------------------------------------------------------------------------------------------------------------------------------------------------------------------------------------------------------------------|
| 2010            | Resolución n°667- Establece, requisitos para la fabricación, importación, expendio y prescripción de medicamentos veterinarios cuya condición de venta sea bajo receta retenida con control de saldo y deroga resolución n° 206 de 2004                                |
| 2011            | Decreto n° 24- Modifica Decreto n° 25 de 2005                                                                                                                                                                                                                          |
| 2017            | Decreto n° 4- Reglamento de alimentos para animales                                                                                                                                                                                                                    |
|                 | Resolución n°6801- Establece requisitos para el registro, comercialización y uso de antimicrobianos                                                                                                                                                                    |
| 2018            | Resolución 4579- Modicase la Resolución Exenta N° 6.801                                                                                                                                                                                                                |
| 2020            | Resolución n° 2517- Modifica Resolución n° 6.801 exenta, de 2017                                                                                                                                                                                                       |
| 2021            | Código de ética profesional                                                                                                                                                                                                                                            |
| -               | Antimicrobianos                                                                                                                                                                                                                                                        |
| -               | Manual de Buenas Practicas de Sobre Bienestar Animal em Sistema de Producción Industrial de Cerdos                                                                                                                                                                     |
| -               | Programa de Control de Residuos em Productos Pecuarios                                                                                                                                                                                                                 |
| <b>Colombia</b> |                                                                                                                                                                                                                                                                        |
| <b>Year</b>     | <b>Legislation/Other Documents</b>                                                                                                                                                                                                                                     |
| 1981            | Resolución n° 1326- Se adoptan disposiciones para utilización y comercialización de productos antimicrobianos de uso veterinario                                                                                                                                       |
| 1984            | Resolucion n° 1966-Reglamenta el uso de products o sustancias antimicrobianas como promotores de crecimientos o mejoradores de la eficiencia alimenticia                                                                                                               |
| 1996            | Resolución n°1056-Dictan disposiciones sobre el control técnico de los Insumos Pecuarios y se derogan las Resoluciones No. 710 de 1981, 2218 de 1980 y 444 de 1993                                                                                                     |
| 2000            | Ley 576- Expide el código de Etica para el ejercicio profesional de la medicina veterinaria, la medicina veterinaria y zootecnia                                                                                                                                       |
| 2003            | Resolución n° 3826 - Establece el cumplimiento de las Buenas Prácticas de Manufactura para las empresas productoras por contrato de medicamentos veterinarios                                                                                                          |
| 2007            | Resolución n° 2341- Reglamentan las condiciones sanitarias y de inocuidad em la producción primaria de ganado bovino y bufalino destinado al sacrificio para consumo humano                                                                                            |
|                 | Resolución 2640- Reglamentan las condiciones sanitarias y de inocuidad en la producción primaria de ganado porcino destinado al sacrificio para consumo humano                                                                                                         |
| 2008            | Resolución n° 3585- Se establece el sistema de inspección, evaluación y certificación oficial de la proucción primaria de leche                                                                                                                                        |
| 2013            | Resolución 1382- Establecen los limites máximos para residuos de medicamentos veterinarios em los alimentos de origen animal destinados al consumo humano                                                                                                              |
|                 | Decreto 2113- Se adiciona um capítulo al decreto 1071 de 2015                                                                                                                                                                                                          |
| 2017            | Resolución 10204- Se establece el Sistema Nacional de Farmacovigilancia para medicamento y biológicos de uso veterinario                                                                                                                                               |
|                 | Resolución 62542- Se establecen los requisitor y el procedimiento para el registro de los medicamentos de uso veterinaria ante el ICA                                                                                                                                  |
| 2020            | Resolución n°61252- Establecen los requisitor y el procedimiento para el registro de los fabricantes e importadores de alimentos para animales, así como los requisitor y el procedimiento para el registro de alimentos para animales y se dictan otras disposiciones |
| 2021            | Resolución n°90382-Por medio de la cual se establecen los requisitos para la comercialización, distribución, almacenamiento de los insumos agropecuarios y semillas para siembra.                                                                                      |
| -               | Buenas prácticas em el uso de los medicamentos veterinarios y la inocuidade de los alimentos                                                                                                                                                                           |
| -               | Investigación y Vigilancia Integrada de la Resistencia Antimicrobiana                                                                                                                                                                                                  |
| <b>Uruguay</b>  |                                                                                                                                                                                                                                                                        |
| <b>Year</b>     | <b>Legislation/Other Documents</b>                                                                                                                                                                                                                                     |
| 1993            | Resolución n° 328- Control de los alimentos destinados a la nutrición animal a efectos de verificar su composición, calidad y destino                                                                                                                                  |
| 1997            | Decreto n°160- Aprobacion del marco regulatorio sobre productos veterinarios en el mercosur                                                                                                                                                                            |
| 2003            | Resolución n° 360- Programa nacional de residuos biologicos en alimentos de origen animal                                                                                                                                                                              |
| 2004            | Decreto n° 177- Establecer que los establecimientos productores de carne y leche con fines comerciales deberán llevar una planilla de registro de utilización de productos veterinarios                                                                                |
| 2011            | Decreto n° 98- prohibicion del uso de antibioticos en la alimentacion para animales ovinos y bovinos                                                                                                                                                                   |
| 2012            | Resolución n°48- Apruébase la Norma Técnica de Buenas Prácticas de Fabricación                                                                                                                                                                                         |
| 2012            | Resolución n°89- Aprobar los requisitos para la habilitación e implementación de Buenas Prácticas de Fabricación en los Establecimientos Elaboradores de Alimentos para Animales                                                                                       |
| 2015            | Resolución n° 193- Regulación de las condiciones de comercialización y uso de antibióticos y antimicrobianos para animales                                                                                                                                             |
| 2018            | Decreto n° 389-Reglamentacion de la ley 19.258 relativa a la creacion del colegio veterinario del uruguay                                                                                                                                                              |
| 2022            | Resolución n°22- Apruébase los Requisitos de bioseguridad y el Procedimiento para la habitación, ampliación y refrendación de establecimientos avícolas.                                                                                                               |
|                 | Formulario de inscripción para producto farmacológicos de uso veterinario                                                                                                                                                                                              |
| -               | Buenas prácticas de uso de medicamentos veterinarios                                                                                                                                                                                                                   |
| -               | Buenas Prácticas Ganaderas: Guía para la implementación en la producción de ganado vacuno de carne                                                                                                                                                                     |
| -               | Guía de Buenas Prácticas en Bienestar Animal durante la Cría y Faena de aves de producción de carne                                                                                                                                                                    |

|                 |                                                                                                     |
|-----------------|-----------------------------------------------------------------------------------------------------|
| -               | Control de Venta de produtos veterinarios                                                           |
| -               | Uruguay frente al desafío de los antimicrobianos en salud animal y cadenas productoras de alimentos |
| <b>Mercosul</b> |                                                                                                     |
| <b>Year</b>     | <b>Legislation/Other Documents</b>                                                                  |
| 1993            | Resolução nº 11- Marco Regulatório para Produtos Veterinários                                       |
| 1996            | Resolução nº 39- regulamentação complementar do marco regulatório de produtos veterinários          |

Source: Authors based on Brazil: Ministério da Agricultura Pecuária e Abastecimento, Conselho Federal de Medicina Veterinária; Argentina: Servicio Nacional de Sanidad y Calidad Agroalimentaria; Consejo profesional de Medicos Veterinarios; Colombia: Ministerio de Agricultura y Desarrollo Rural, Instituto Colombiano Agropecuario (ICA), Consejo Profesional de Medicina Veterinarias e Zootecnica; Chile: Servicio Agrícola y Ganadero, and Colegio Médico Veterinario de Chile; Uruguay: Ministerio da Ganaderia Agricultura y Pesca, and Colegio Veterinario de Uruguay; and Mercado Comum do Sul.
